# Supplementary material for: Comparative genomic analysis of Tropheryma whipplei strains reveals that diversity among clinical isolates is mainly related to the WiSP proteins
Source: PubMed Central journal article supplement (PMC2078596; doi:10.1186/1471-2164-8-349), 2007-10-02

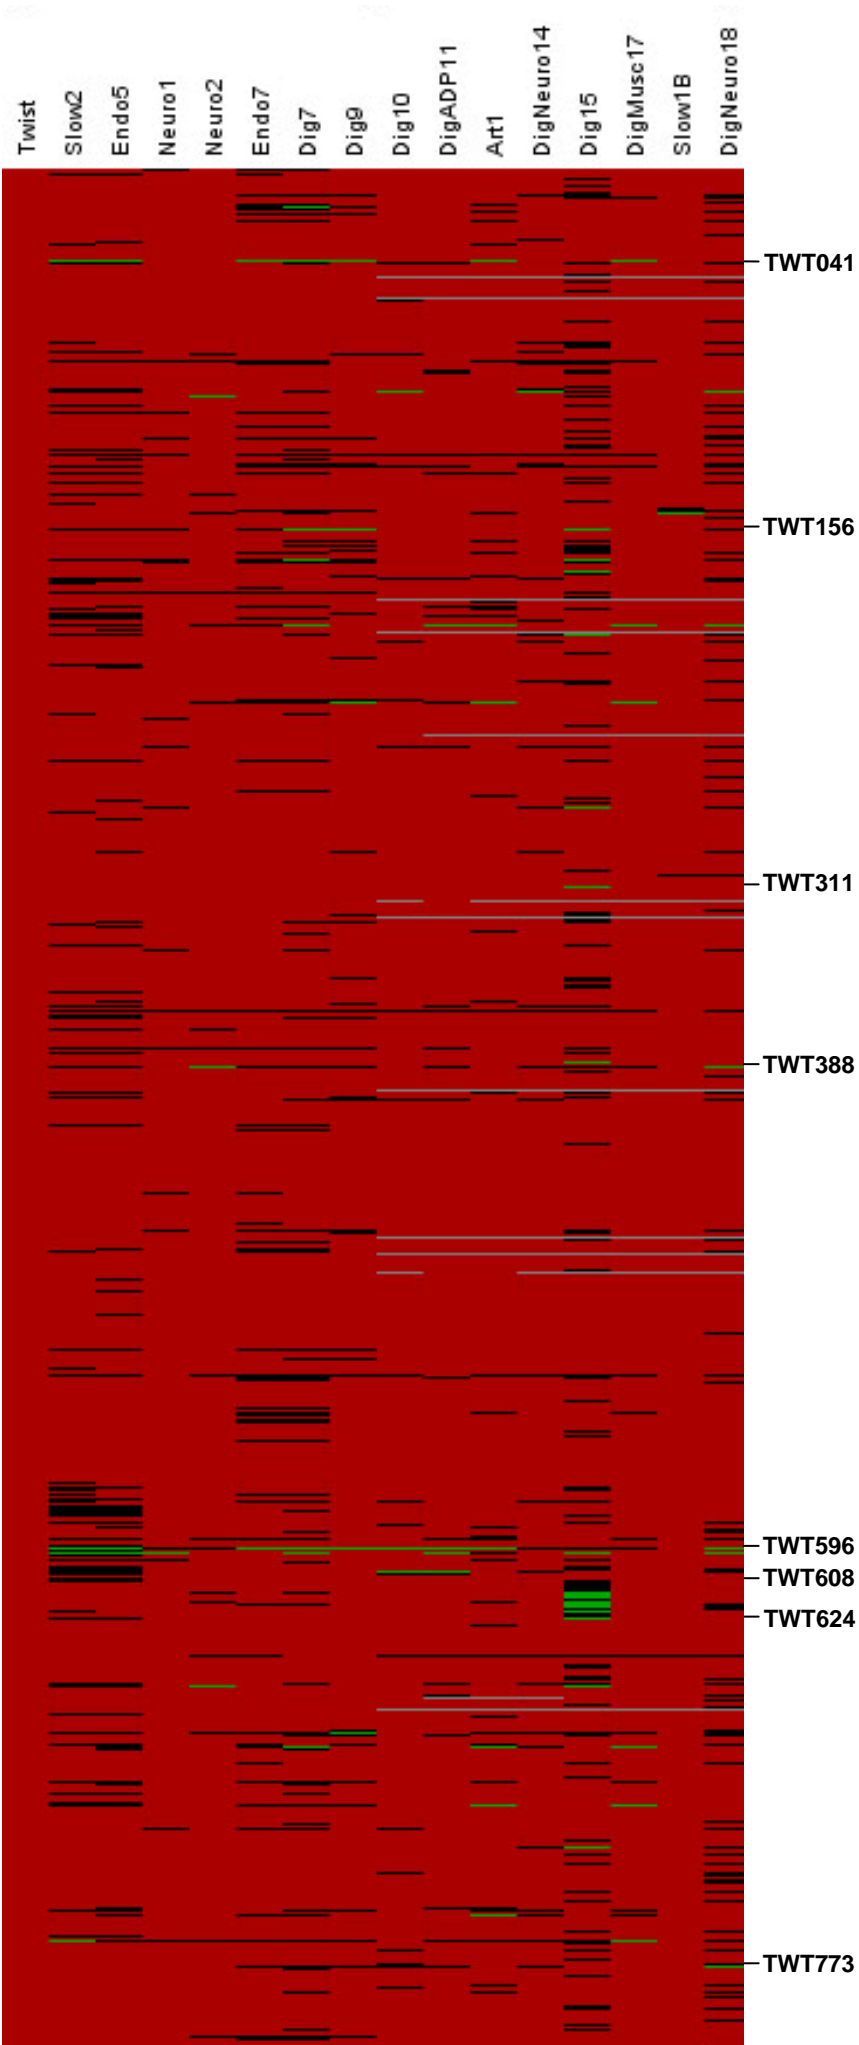

Supplement: 1471-2164-8-349-S1.pdf [file 1471-2164-8-349-S1.pdf]
