# Supplementary material for: Comparative genomic analysis of Tropheryma whipplei strains reveals that diversity among clinical isolates is mainly related to the WiSP proteins
Source: PubMed Central journal article supplement (PMC2078596; doi:10.1186/1471-2164-8-349), 2007-10-02
Supplement: 1471-2164-8-349-S2.pdf [file 1471-2164-8-349-S2.pdf]

## Alignment of protein sequences from several *T. whipplei* isolates

### TWT018: deoD

Twist YVLVIGARTHLYQGHGPEAVVHGIKTAHAAGARVAILTNGAGSTVPDWGPGEVVVIX  
Dig7 YVLVIGARAHLYQGHGPEAVVHGIKTAHAAGARVAILTNGAGSTVPENGPGEVVVIX

### TWT099: unknown

Twist YITYFIVDKLRRLYLQPNCLFNLFWLPNCLFNLFWLPNLLLWLV  
Dig10 LYHLFH\*CRA\*VIPVTQPFIVVSPVLGGLGN\*GELFLLHV  
DigNeuro14 YITYFIDAGLGYSYPTIICYG\*SCFGLGLGN\*GELFL  
DigNeuro18 SNRPCIFVPISPISLYHLFH\*CRLRLYLQPNHLLWLV

### TWT171: unknown

Twist RMHWPVDACWPGIKLFWINWSLLVFSAILLWYAFSACRKYVGRVVAYIGSIGGGALLSLRLLAHPSTPHL  
Dig7 RMHWPVDACWPGIKLFWRTNWSLLVFSAILLWYAFSACRKYCHVVAYIGSIGGGALLSLRLLAHPSTPHL  
Dig15 RMYGPVDACWPGIKLFWTNWSLLVFSAILLWYAFSACRKYHVVAYIGSIGGGALLSLRLLAHPSTPHL

### TWT176: unknown

Twist EVATLFTGAGLGKAAGKAAAKLKFADKAAGKLVKQFLERLHVKAADTAANKVLHFGIDALSLPCKGRKPYII  
Dig15 EVATLFTGAGLGKAAGKAAAKLKFADKAAGKLVKQFLERLHVKAADTAANKVLHFGIDALSLPCKGRKPYII

### TWT199:ftsE

Twist GITTKLLVQDKEVSVFLSTKEGAAGSSDASSCANNITGTGRCDTGLRDT----HKSDTHNATPRDRALLHDPGLHDTGLQGDVTQGYMT  
Dig7 GITTKLLVQDKEVSVFLSTKEGAAGNSDASSCANNITDTGVRDTGVRDT----HKSDTHNATPRDRALLHDPGLHDTGLQGDVTQGYMT  
Art1 GITTKLLVQDKEVSVFLSTKEGAAGNSDASSCANNITDTGVRDTGVRDTGVRDTHKSDTHNATPRDRALLHDPGLHDTGLQGDVTQGYMT  
DigMusc17 GITTKLLVQDKEVSVFLSTKEGAAGNSDASSCANNITDTGVRDTGVRDT----HKSDTHNATPRDRALLHDPGLHDTGLQGDVTQGYMT  
DigNeuro18 GITTKLLVQDKEVSVFLSTKEGAAGNSDASSCANNITDTGVRDTGVRDT----HKSDTHNATPRDRALLHDPGLHDTGLQGDVTQGYMT  
DigADP11 GITTKLSGSRRKEVRFCQQKR--AQQVTMQVAAQIT\*PIQGVIQGVIPINLIHIMQHPVTAHYYMTLDCMMLDYREM\*HKGT\*HX

### TWT203: ksgA

Twist PTSQLHGLQVTSQSHPTNQGVHDTGLRDTHKSDTHNATPRDRALLHDPGLHDTGLQGDVTQGYMT  
Dig15 PTSQLHGL-----QHLTNQGRCDTGLRDTHKSDTHNATPRDRALLHDPGLHDTGLQGDVTQGVRH

### TWT232: wisP

Twist AVGVFSNGAGPTTPVVVVHPNNRTTVCLTCICNRAVIRLRPKCIGEPVKHILSSX  
Dig9 AVGVFSNGADSTTPVVVVPPNNRTICLTCICNRTVIRLRPKCIGEPVKHILSSX  
Art1 AVGVFSNGADSTTPVVVVPPNNRTICLTCICNRTVIRLRPKCIGEPVKHILSSX  
DigMusc17 AVGVFSNGADSTTPVVVVPPNNRTICLTCICNRTVIRLRPKCIGEPVKHILSSX

### TWT277: unknown

Twist IDTNINPYKRRQAPTQHRQAYARAKLTGRRRATNPARTSQSDRAKLCY  
Dig15 IDTN\*PA\*EATN-PT\*HRQAYARAKLTGRYKPHSSNQPVRSGKTMLS

### TWT311: unknown

Twist LFFVVSFGTHLQNLGVKETFQNKGTGLHKFVMLFKQRLWLVGAVLLAIASILQVLSLVFAPLVVVQPLX  
Dig15 LFFVVSFGTHLQNLGVKETFQNKGTGLHKFVMLFKQRLWLVGAVPPAIASILQVLSLVFAPLVVVQPLX

### TWT386: trpE

Twist FSKLLDCDPQPWPLGFGVWIDYEVGACLLGVNYPTQQDAPATGQTNLSSWICCNRAICIDYRMGLLKIISFSKNTVDAKEWVX  
Dig15 FSKLLDGDPQPWPLGFGVWVDYEVGACLLGVNYPTQQDAPATGQTNLSSWICCNRAICIDYRMGLLKIISFSKNTVDAKEWVX

### TWT388: unknown

Twist STMQGLSEALRVPDKVTDTRLFNRNIELMKHGIQSADQAVEKAKESMLLNHKAKKMRKAFDDDLVLFRLER IAGH  
Neuro2 STMQGLSEALRVPDKVADTRLFNRNIELMKHGIQSADQAVEKAKESMLLNHKAKKMRKAFDDDLVLFRLER IAGH  
DigNeuro18 STMQGLSEALRVPDKVADTRLFNRNIELMKHGIQSADQAVEKAKESMLLNHKAKKMRKAFDDDLVLFRLER IAGH

**TWT594: WiSP**

Twist VPYL----AVRIVYSVSH<sup>T</sup>IYSYANPSLKARVLLY<sup>T</sup>QSQSNVSI<sup>T</sup>PILYGSFSI<sup>S</sup>TYVLVDTT<sup>T</sup>GATSGSTGLPKGLSF-TSGTITGSIDIRX  
Slow2 VPYL----AVRIVYSVSH<sup>T</sup>IYSYANPSLKARVLLY<sup>T</sup>QSQSNVSI<sup>T</sup>PILYGSFSI<sup>S</sup>TYVLVDTT<sup>T</sup>GATSG<sup>X</sup>TGLPKGL<sup>T</sup>LDSSGTITGSIDIRX  
Endo5 VRTLLSVLYTQPCYIISRIIYSYANPSLKARVLLY<sup>T</sup>QSQSNVSI<sup>T</sup>PILYGSFSI<sup>S</sup>TYVLVDTT<sup>T</sup>GATSGSTGLPKGL<sup>T</sup>LDSSGTITGSIDIRX  
Endo7 FRTLLSVLYTQPCYIFSRI IYSYANPSLKARVLLY<sup>T</sup>QSQSNVSI<sup>T</sup>PILYGSFSI<sup>S</sup>TYVLVDTT<sup>T</sup>GATSGSTGLPKGL<sup>S</sup>FDSSGTI<sup>K</sup>GSIDIRX  
Dig9 FRTLLSVLYTQPCYIFSRI IYSYANPSLKARVLLY<sup>T</sup>QSQSNVSI<sup>T</sup>PILYGSFSI<sup>S</sup>TYVLVDTT<sup>T</sup>GATSGSTGLPKGL<sup>T</sup>LDSSGTITGSIDIRX  
Dig10 VPYL----AVRIVYSVSH<sup>T</sup>IYSYANPSLKARVLLY<sup>T</sup>QSQSNVSI<sup>T</sup>PILYGSFSI<sup>S</sup>TYVLVDTT<sup>T</sup>GATSGSTGLPKGL<sup>T</sup>LDSSGTITGSIDIRX  
DigADP11 VPYL----AVRIVYSVSH<sup>T</sup>IYSYANPSLKARVLLY<sup>T</sup>QSQSNVSI<sup>T</sup>PILYGSFSI<sup>S</sup>TYVLVDTT<sup>T</sup>GATSGSTGLPKGL<sup>T</sup>LDSSGTITGSIDIRX  
Art1 VPYLLLSVLYTQPCYIFSRI IYSYANPSLKARVLLY<sup>T</sup>QSQSNVSI<sup>T</sup>PILYGSFSI<sup>S</sup>TYVLVDTT<sup>T</sup>GATSGSTGLPKGL<sup>S</sup>FDSSGTI<sup>K</sup>GSIDIRX  
DigNeuro18 FRTLLSVLYTQPCYIFSRI IYSYANPSLKARVLLY<sup>T</sup>QSQSNVSI<sup>T</sup>PILYGSFSI<sup>S</sup>TYVLVDTT<sup>T</sup>GATSGSTGLPKGLSF-TSGTITGSIDIRX  
Dig7 SVPCYPCYILSHAIYSYAVSYHTHLIQA\*KHVVYCTHRVRVM\*VLHLYSTEAFLYPHMY\*\*IQQVLHGSTGLPKGLSFDSSGTI<sup>K</sup>GSIDIRX

**TWT596: WiSP**

Twist ANGSDTFLYPTDQLTEGGEGYTPIPVSTQSLSNFTIDTVSNTWTYTGSGKTNQTQGTVTLIIITAYKNSTSSSTQQTW  
Dig7 QMAKRHTYTPQIN\*PRVEKSYTPITVSTQSLH-FTIDLTSNTWTYTGSGNTNQTQGTVTLITITAYKNSS<sup>T</sup>STQR<sup>TW</sup>

**TWT604: unknown**

Twist LLLRNLRYRLGHRLCHLVGRPRCLWVIVGGSLFLLIVFSKIRRENIQQNKIX  
Dig10 LLLRNLRYRLGHRLGHRVGRPRCLWVIVGGSLFLLIVFSKIRRENIQQNKIX

**TWT653: membrane protein**

Twist TVTLTHVTQQTRNSTDRWVIGVTDLYYGTDAWGFYKAGWSLQAAALVAVTSVVPSPVPLKAALRVILPALLKGAVKFAGS  
Neuro2 L\*PLHMQRNRHRQDFPGVMTHGVST\*NWNGMNKLLPQLALPLVAVPAWPLRPL\*K\*P\*RQAPRFLAWRVVDKLSDIIGA

**TWT673: unknown**

Twist RPAAVSVAGGLTGFVGGAVSGCVLGGRLVDDL<sup>V</sup>NGFNAGFNAV<sup>G</sup>DFV<sup>G</sup>GKLF<sup>G</sup>  
Dig9 RPAAVSVAGGLTGFVGGTVSGCVLGGS\*\*SCQWV\*CWI\*RRW\*LCKRAIRI

**TWT679: unknown**

Twist KPLSRGIKIGASVVALCVSVLLIAIFSLMTRPIGNDYHTTSFKVKSNEVIVEFSFTGHIPTVCAVRVLGRDMSTVGWKVVPVLSPHMEVGLRTTKVAX  
Dig7 KPLSRGIKIGASVVAICVSVLLIGIFSLMTRPIGNDYHTTSFKVKSNEVIVGFSFTGHIPTVCAVRVLGHDMSTVGWKVVPVLSPHMEVGLRTTKVAX  
Art1 KPLSRGIKIGASVVAICVSVLLIGIFSLMTRPIGNDYHTTSFKVKSNEVIVGFSFTGHIPTVCAVRVLGHDMSTVGWKVVPVLSPHMEVGLRTTKVAX  
DigMuscl7 KPLSRGIKIGASVVAICVSVLLIGIFSLMTRPIGNDYHTTSFKVKSNEVIVGFSFTGHIPTVCAVRVLGHDMSTVGWKVVPVLSPHMEVGLRTTKVAX

**TWT704: unknown**

Twist YKTYFSRTRWERELSEAVCFNGKQLNSAIHYGIYRTGVIDPVWTA<sup>F</sup>IFK<sup>W</sup>VYA<sup>F</sup>R  
Art1 YKTYFSRTRWERELSEAVCFGGKQLNSAINYGVYRTGVIDPVWTV<sup>F</sup>IFK<sup>W</sup>VYA<sup>F</sup>R  
DigMuscl7 YKTYFSRTRWERELSEAVCFGGKQLNSAINYGVYRTGVIDPVWTV<sup>F</sup>IFK<sup>W</sup>VYA<sup>F</sup>R

**TWT751: unknown**

Twist IRKASQMLKDWRLSGLTLFVTMEPCTMCAGAIVTSRISR<sup>V</sup>VFGAFNNKTGSVGSRIDILR  
Art1 IRKASQMLKDWRLSGLTLFVTMEPCTMCAGAIVTSRISR<sup>V</sup>VFGVFNNKTGSVGSRIDILR

**TWT762: unknown**

Twist LRGWSGSGDFGVSRLTRVLPVLVLPVALVVEEGASERLPNNFLNGHVMPCHIH<sup>L</sup>NGAAIPLPTFDQNPPLLSVGVERHLSNIDCX  
DigMuscl7 LRGCSGSCDFCAPRLRFLPLVLPVALVVEEGASERLPNNFLNGHVMPCHIH<sup>L</sup>NGAAIPLPTFDQNPPLLSVGVERHLSNIDCX

**TWT773: unknown**

Twist IAHLTLLTATLLTATLSALGIEKQHGLSLERASTWRSALRNLGIKQQINMGFVPGHMLWHAGHLV  
DigNeuro18 IAHLTLLSAN-----LSALGIEKRHGLSLERASTWRSALRNLGIKHTNKHGVRARSHAMACWASGL
