# Supplementary material for: Comparative genomic analysis of Tropheryma whipplei strains reveals that diversity among clinical isolates is mainly related to the WiSP proteins
Source: PubMed Central journal article supplement (PMC2078596; doi:10.1186/1471-2164-8-349), 2007-10-02
Supplement: 1471-2164-8-349-S3.pdf [file 1471-2164-8-349-S3.pdf]

**Nucleotidic sequences of the genomic region amplified in *T. whipplei* DIG15 with primers TWT607F1 and TWT625R1**

CGCCAATTACCAGTCAAATAATTACGAATAATACCTGACAACTTGAATTATTTGAATTA  
GATCCCCGAACCGGAGGATGAAGCTGGCTTTTTGACTAATTTACCATAAAGATAAAACGGC  
AAGAAGTAAACACCTCCAACAGAAACAGCAGACATAAAAGCTCGGAAAACTTACCACCC  
CAGCCAGAAAACTAGGTAAATGGGCAGATATCTTCTATACAAGGCCCTAATGCCAACT  
TGCCCATATAGAGATGCTACTGGATAGGCATAGCTTTTCCAGTCATAACATGCATCTGAA  
TTATGTGCTGCAGAGTAAAAGCATGTAGGCATTAACCAGTGTGTACTGCGGCAGGT  
AGGAGGGCGCCGCAACAGCACCAAGGAAACCTTGGCTTGTGTGTGGTGGACTGGGGTG  
CAAGTGTGAGAGAACCAACTGTATATAGCTTTGAATGGCTTGGTTAGATAGTATTTGACC  
CTTTGGAAGAATTTACATACTACTTAGCACAAGGGTATATACAGCAGTAACAGTTGTGCTA  
CCAAGGGTTGTAGAGGAAGTATAGGAAGGTGCAGTTGCAGTAATAGTTACTGTATATGTT  
CCAGGCACAATACTTGGGGTGATTGTATATTTGCCATTGGTTTTATCAATATATGATGGTT  
ACGGTGTACTGTCTGTGGTTAGGGTGGTTGGGCTTATTTGTGTAACCGGTTATAAAACCT  
GTTACAGATAAGCTGACAGGTGTTGTGTATATGGTTATGGTTGTACCAGATAGATAT  
GGTGTCTACTGTTAACAAGAAATGTATATGTTGCACATAACAATTGATGTTTTTGTATGCA  
GTGGCAGTTACTACTACTGTATATATACCTTGGCTAACACCTGTATCTATACTTCTGT  
ATCTCTCCTTTGGTTTTATCAAGGGTAGTCTTTAGGTAGACCTGTAGCACCAGTTCCA  
CCAGATGTAGCATCTGTAGGTGTAGCTATATAGCCAGATAGAGAACCTCTTGCCTTGGGT  
GTAATAGTTATATATAGTCTGACCTATAGATACACCTGTGGCAGATAGAGATGTACCAAG  
AGGGAGCCTATGCCACTGAATAGGTTGCCAAGATGCTGCCGGGTGATCGTGTGGGGGCA  
GCTCTCTTAGATCTGTTATGGGTTGTGGGTTGTGTATCTATTGCATAGGTGATATGG  
GTGGTTGTGTCTTTGTTTTATGGCTATGGCTGTATGGGAGATGTTGGTAGGGATGAGAGA  
TGTATCTGTCCGGTGTATCTATCTATGGTTATGTCTTTGTTTGGGTGTGTTAGGGAGAAG  
GTGTATCTGGAGTTTCTGAGTGATGGTATGTCTGAGAGATATGTGTATCTATCTGTTTG  
TGTATGGGAACAGTTATCTTTGGTTTCTCTGTACATGTATGTCAAAGAAGAAGATGTTA  
CGGGTTGTTAGGAGAGCTATGAGATTGGTTGTTGTCTTTGTTATGGAGACTACTTTCTCA  
TCTCCGTATGGGGTTGCTATGTCTGTATGAGGGAAGGTTAGGAAAAGATGATGGATCTGCT  
TTCTTATCTGTGTAATAGAGGGATATATGTGTGTTGGTTATATATGGGACATATAGGTAT  
GAGGATGTATCTGTGTATGGGACATATATATGTGTCTGTGGTTGGGGTGAGAGAGATGGG  
GTGCAGGACAGGGTTTGTGTTGACTGCTTGTAAACAGGATCTATTAGGAGAGATACATTT  
GTGTTAGTTGTTACACATACTTCTTGTGATTTGTATTACTTACTCTTGTGTATTTGGTA  
CTAGATGAAACAGATGTAGATGAAACAGATGATAGGAGGGATAGGGCAGGAGGTGTCTGT  
CTGGCAAAGGCTGTTTCATATTGTAGGGATGATAGGAGGAGAAGGGTTAATAGTAAGGTA  
AAGGCTTTGGTGAGGTAAGAGAGAGGGTTAGGCGATGTTGGCAATCCCCCCCCCTTCTG  
TTTTGTTTTCTGTTTTGGGGGTTACCTATTAGGGACCAGTTTGCACCTTCATAATACTC  
ATAGTACCTCACTATACATGCGTCTGCATACACGCACCTGTGCCGATTGTAACACATTTG
