# Supplementary material for: Comparative genomic analysis of Tropheryma whipplei strains reveals that diversity among clinical isolates is mainly related to the WiSP proteins
Source: PubMed Central journal article supplement (PMC2078596; doi:10.1186/1471-2164-8-349), 2007-10-02
Supplement: 1471-2164-8-349-S4.pdf [file 1471-2164-8-349-S4.pdf]

## Oligonucleotide primers used for PCR and sequencing

| Gene ID | Primer sequence (5' --> 3') for PCR |                            | Product size<br>(bp) in Twist | Primer sequence (5' --> 3')<br>for sequencing |                           |
|---------|-------------------------------------|----------------------------|-------------------------------|-----------------------------------------------|---------------------------|
| TWT018  | TWT017F1                            | ccggatcattctcaatccacaagc   | 990                           | TWT018sF1                                     | tctgcccgatagatcttgcccgat  |
|         | TWT019R1                            | tcttgacagacactctcagccttct  |                               | TWT019sR1                                     | tcttgacagacactctcagccttct |
| TWT041  | TWT040F1                            | aggtaaagcgatccattgggcag    | 1380                          | TWT041sF1                                     | gcgctgttagcgggtgcagtt     |
|         | TWT042R1                            | agggttaccagatcaagcgagaac   |                               | TWT041sR1                                     | caggacacgtaaacgcaaga      |
| TWT099  | TWT098F1                            | tcttcatagaccggccagggtc     | 2460                          | TWT099sF1                                     | cgtgagttctataaacgtg       |
|         | TWT100R1                            | aaagctggatccgtatctgaatgtt  |                               | TWT099sR1                                     | gtggcagcggcttttagctgg     |
| TWT101  | TWT100F1                            | ccgctgccacaaggcccttgaa     | 4498                          | TWT101sF1                                     | cggcaaaaagcgcgtcaaacg     |
|         | TWT102R1                            | gcaaaaaacgcgttagcgcggagc   |                               | TWT101sR1                                     | gcatgaatttctatgcatacct    |
| TWT151  | TWT150F1                            | ctgccaatagagtttgcceaag     | 1920                          | TWT151sF1                                     | gccacacattcatcctctac      |
|         | TWT152R1                            | gatgtgcgtgttatgcgtgtcga    |                               | TWT151sR1                                     | ggtaaaatcctgcgcgaata      |
| TWT158  | TWT157F1                            | cggctaaaaatccgacagcaaatgac | 1740                          | TWT158sF1                                     | gggtcatgtgatgacattcg      |
|         | TWT159R1                            | cccaagtgcctcgaaggttagc     |                               | TWT158sR1                                     | cacggtccacatttcacaag      |
| TWT171  | TWT170F1                            | gagtggaaacattgaatctgtcaccg | 4800                          | TWT171sF1                                     | gccacgttaattgcttcata      |
|         | TWT172R1                            | cagcaatagacaggatggttcgtatc |                               | TWT171sR1                                     | aggcgaataagcttgggttt      |
| TWT176  | TWT175F1                            | aagcaacctcctgggacatctgac   | 1560                          | TWT175sF2                                     | gtactcttaatcccctgggggtact |
|         | TWT177R1                            | gcactcgggaagacgctcgtctgtg  |                               | TWT177sR2                                     | acggccaattaagactaacgaagcg |
| TWT199  | TWT198F1                            | gccggaataaaatggcacgcgc     | 3060                          | TWT199sF1                                     | cgagttgctcagggtcagtc      |
|         | TWT200R1                            | aaatgtgacgataatcacagaggag  |                               | TWT199sR1                                     | ctgtatctccgactggaca       |
| TWT203  | TWT202F1                            | atacaggaacatataccttccctg   | 1620                          | TWT203sF1                                     | cgtgcacaggtcaatctcat      |
|         | TWT204R1                            | gagacaacctcgcacctcgcacc    |                               | TWT203sR1                                     | ccgctctgatcgtcactgta      |
| TWT232  | TWT231F1                            | catcagcccgcattctcatcttc    | 1020                          | TWT232sF1                                     | ggtctacatattacgtagact     |
|         | TWT233R1                            | gcaattaagggtgctatttttgc    |                               | TWT232sR1                                     | cgcagaagaatcgagggcaa      |
| TWT277  | TWT276F1                            | caagctcaaagaagcacgtctgag   | 1140                          | TWT277sF1                                     | gcggttattctcgtttgtcc      |
|         | TWT278R1                            | gtatgctcagcgcctgtcgacatca  |                               | TWT277sR1                                     | cagcctggctttttatgggt      |
| TWT311  | TWT310F1                            | aaacatatctcgtacaatttctctg  | 1380                          | TWT311sF1                                     | gtattttccaccgcgtgatt      |
|         | TWT312R1                            | gaatttggcgcaccattaacttc    |                               | TWT311sR1                                     | cgctgattttagccatcag       |
| TWT386  | TWT385F1                            | ggggccatttttcttaaggc       | 1620                          | TWT386sF1                                     | ggcatgagttttgagtttct      |
|         | TWT387R1                            | caattaggagcagtggttaatgc    |                               | TWT386sR1                                     | cgattcggagaattgctttt      |
| TWT388  | TWT387F1                            | ttgcccatggaacagcttgttg     | 1740                          | TWT388sF1                                     | gcggttgattgtggtaaa        |
|         | TWT389R1                            | gtggaaaaatgcaagacttgaac    |                               | TWT388sR1                                     | ggcggccttattcaactgt       |
| TWT594  | TWT593F1                            | tccatggaggatcgaaatagttg    | 720                           | TWT594sF1                                     | ggcgattggatctgtctatctt    |
|         | TWT595R1                            | gaggctattagattcgtaagattg   |                               | TWT594sR1                                     | gaccggatgagtggttgag       |
| TWT596  | TWT595F1                            | tgtataggccggatcgtttatc     | 2040                          | TWT596sF1                                     | cagtcgggtgcaggtatagg      |
|         | TWT597R1                            | cagagataaacgcagatctggag    |                               | TWT596sR1                                     | caccaagacaacgggta         |
| TWT604  | TWT603F1                            | cgagacgaggccatcattataccaa  | 2700                          | TWT604sF1                                     | gcacctcttctctgggtgt       |
|         | TWT605R1                            | tgtgtgcaccccatccacctgc     |                               | TWT604sR1                                     | cccatgataccatctggctc      |
| TWT653  | TWT652F1                            | gccctgccaagcacagttaacgg    | 1975                          | TWT653sF1                                     | gccacactgtgtctgaagg       |
|         | TWT654R1                            | cattatgcgtagaccaatgcccttc  |                               | TWT653sR1                                     | cccacatacgcaacaacatc      |
| TWT673  | TWT672F1                            | gcgctgagcatttaactgtgatac   | 600                           | TWT672sF1                                     | gcgctgagcatttaactgtgatac  |
|         | TWT674R1                            | cgacactgccggttaaggatggcg   |                               | TWT674sR1                                     | cgacactgccggttaaggatggcg  |
| TWT679  | TWT678F1                            | gcctccgaccttccggaccaac     | 1380                          | TWT679sF1                                     | cctggatgaatcgtaaaca       |
|         | TWT680R1                            | gctatttctctgtccccagcagg    |                               | TWT679sR1                                     | ccttcagaccttctgtctc       |

|            |          |                            |        |           |                           |
|------------|----------|----------------------------|--------|-----------|---------------------------|
| TWT704     | TWT703F1 | ttcgctattgttacaacgggtg     | 420    | TWT704sF1 | ggtgacaagctcccatcct       |
|            | TWT705R1 | gaaagctagtgccggtaccattcctg |        | TWT704sR1 | ccattcctgacgcaagtaca      |
| TWT722     | TWT721F1 | cgatgatgtggccgctgctgtggag  | 1140   | TWT721sF1 | cgatgatgtggccgctgctgtggag |
|            | TWT723R1 | gaccgattccggtatgaatggcgt   |        | TWT723sR1 | gaccgattccggtatgaatggcgt  |
| TWT751     | TWT750F1 | ctccgattgtttgtccagctctgtg  | 1320   | TWT751sF1 | ggtgattgccgatgtgaac       |
|            | TWT752R1 | gtgtgaccgttatgtttgcgtcggg  |        | TWT751sR1 | tcctaagtctcggtttcca       |
| TWT762     | TWT761F1 | ctcgttacagtgtatgtgagaac    | 2740   | TWT762sF1 | gcaagtgtgagagaaccaagtg    |
|            | TWT763R1 | ctccaaatgcactccatagcttg    |        | TWT762sR1 | caggcattaccctgcttt        |
| TWT773     | TWT772F1 | caatccgtcatcatagccgggga    | 660    | TWT772sF1 | caatccgtcatcatagccgggga   |
|            | TWT774R1 | agcatcctcgggtgcttgattgta   |        | TWT774sR1 | agcatcctcgggtgcttgattgta  |
| TWT607/625 | TWT607F1 | cgccaattaccagtgaataattacg  | 21 088 | TWT607sF1 | cgccaattaccagtgaataattacg |
|            | TWT625R1 | tactcatagtacctactatacatg   |        | TWT607sF2 | ctttggaagaattcactacttag   |
|            |          |                            |        | TWT607sR1 | ctacaatgcttttactctgcagcac |
|            |          |                            |        | TWT607sR2 | tataaccagttacgcaataaaccca |
|            |          |                            |        | TWT608sF1 | tttagtagacctgtagcattagt   |
|            |          |                            |        | TWT608sF2 | tatctatctgtttgtgtatgggaac |
|            |          |                            |        | TWT608sF3 | caggagggtctctgtctggcaagg  |
|            |          |                            |        | TWT608sR1 | tctaagagagctgccaccatagat  |
|            |          |                            |        | TWT608sR2 | gatacatcctacacctatagtcc   |
|            |          |                            |        | TWT608sR3 | gctagaattgccacacactgataga |
|            |          |                            |        | TWT624sF1 | ctctgttacatgtatgtcaaagaag |
|            |          |                            |        | TWT624sR1 | tctcctaatagatcctgttacaagc |
|            |          |                            |        | TWT625sF1 | tactcatagtacctactatacatg  |
|            |          |                            |        | TWT625sF2 | gaaaataaccccgcagaggcaattg |
|            |          |                            |        | TWT625sR1 | gtatctcgggtaatggcatgtccg  |
|            |          |                            |        | TWT625sR2 | gggaattcgggtgctcctctgttg  |
|            |          |                            |        | TWT625sR3 | cgcccagggtgtaccccgggtccta |

---
